# Supplementary material for: Myelination synchronizes cortical oscillations by consolidating parvalbumin-mediated phasic inhibition
Source: eLife. 2022 Jan 10;11:e73827. doi: 10.7554/eLife.73827 (PMC8887893; doi:10.7554/eLife.73827)
Supplement: Source data 1. [file elife-73827-data1.xlsx]

## Sheet: Fig. 1d
	Weeks	Cuprizone									Control
	0	1.94737	3.44828	2.81081	6.16216	0	0	3	2	1.88	1.26316	0	0.358974	6.55	0	2.5	3.055	1.89	5.66667
	2	15.1667	9.38889	3.27778	6.66667	0	4	1	2	0.55	2.05714	0	2.25	4.111	4.88	4.4	0	5.333	2.66667
	4	5.6	5.3	2.45	5.06667	15	7.923	2	14.2333	5.22	1.05882	2	1.05882	3.888	2.55	0.55	1.722	3.888	6.66667
	6	66.2941	94.4706	13.2857	9.42857	66.8667	43.1111	12.555	12.75	30.4545	1.36842	2.05263	1.94118	5.968	5.388	2.55	0.333	5.277	2
	8					76.8333	78.9333	68.6667	55.1363						2.59	3.82	2	2.777	2.33333
	Figure panel	Comparison	Type and number tested	Test type	Tails or	Test results	P values
					post-hoc test
	Figure 1d	Control vs.	Mice, N	Two-way ANOVA	Šidák’s multiple comparisons	Time  Treatment	P Time  Treatment = 0.0003
		Cuprizone				F (1.3, 10.59) = 23.54	P Treatment < 0.0001
			4 weeks	mixed-effects model			P Time = 0.0010
			Control, 9			Treatment
			Cuprizone, 9			F (1.0, 8.0) = 57.58
							Multiple comparisons
			6 weeks			Time	Control vs. Cuprizone
			Control, 9			F (1.3, 7.60) = 23.53
			Cuprizone, 9				0 weeks, P > 0.999
							2 weeks, P = 0.9103
			8 weeks				4 weeks, P = 0.1169
			Control, 5				6 weeks, P = 0.0432
			Cuprizone, 4				8 weeks, P = 0.0044

## Sheet: Fig.1f
awake and moving
Frequency bands	Control						Cuprizone
delta	80913.5	7319.37	42688	30532.6	150953	57349.1	74984.2	117807	44433.4	50012.2	136060	54635.8
theta	194760	22964.8	153798	88558.5	413082	95103.3	324540	451265	137155	189142	337337	109351
Beta	62493.2	9621.59	38385.7	24445.9	80788.6	27911.7	97937	123501	37759	62824.4	116443	40085.4
Gamma	105825	17359.5	49306.4	46840.1	223094	51374	163882	183478	54526.5	96424.5	137836	27739.1
quiet wakefulness
Frequency bands	Control						Cuprizone
delta	359729	107758	352435	235457	343901	147735	449542	575115	210059	76405	364464	379165
theta	298311	166999	352929	243590	316511	172147	740968	931165	297664	96616.9	587585	973697
Beta	97554.1	55149.6	70500.1	56805.4	88626.7	46284.6	218765	223783	60901.3	25619.6	120209	228956
Gamma	75217.2	19369.5	28295.6	25632.9	44118.9	26524.6	140931	177802	43119	8683.76	90440.5	130454
Figure 1f	Control vs.	Mice, N	Two-way ANOVA	Šidák’s multiple comparisons	Frequency bands  Treatment	Pfrequency bands  treatment = 0.6378
	Cuprizone				F (3, 40) = 0.5	Ptreatment = 0.0575
		Control, 6				Pfrequency bands = 0.0001
		Cuprizone, 6			Treatment
	In awake and moving				F (1, 40) = 8.6	Multiple comparisons;
					Frequency bands	Control vs. Cuprizone
					F (3, 40) = 3.8
						Delta, P = 0.9920
						Theta, P = 0.1660
						Beta. P = 0.8754
						Gamma, P = 0.9577
Figure 1f	Control vs.	Mice, N	Two-way ANOVA	Šidák’s multiple comparisons	Frequency bands  Treatment	Pfrequency bands  treatment = 0.0821
	Cuprizone				F (3, 40) = 2.3	Ptreatment < 0.0001
		Control, 6				Pfrequency bands = 0.0024
		Cuprizone, 6			Treatment
	In quiet wakefulness				F (1, 40) = 10	Multiple comparisons;
						Control vs. Cuprizone
					Frequency bands
					F (3, 40) = 14	Delta, P = 0.8118
						Theta, P = 0.0013
						Beta, P = 0.8568
						Gamma, P = 0.9292

## Sheet: Fig. 1h
	Control	Shivrer
	1.75	75
	1	8.3
	2	10.16
	2.3	69.5
		87.75
		98
Figure 1h	Mbp+/+ vs MbpShi	Mice, N	Mann-Whitney test	Two tailed	U = 0	P = 0.0095
		Mbp+/+, 4 MbpShi, 6

## Sheet: Figure 1 supplement 1c
	Cuprizone						Mbp-/- mice
delta	449542	575115	210059	76405	364464	379165	296142	148009	754118	111221	441218	586180
theta	740968	931165	297664	96616.9	587585	973697	749653	78583.9	717733	172975	589087	1370000
Beta	218765	223783	60901.3	25619.6	120209	228956	245496	14383.5	215183	62455	76143.3	350030
Gamma	140931	177802	43119	8683.76	90440.5	130454	498.993	547.8	3171.46	1561.33	3087.92	7651.84
Figure 1 supplement 1c	Control vs.	Mice, N	Two-way ANOVA	Šidák’s multiple comparisons	Frequency bands  Myelin models	Pfrequency bands  myelin models = 0.8968
	Cuprizone				F (3, 40) = 0.1985	Myelin models = 0.9255
		Mbp-/- mice 6				Pfrequency bands < 0.0001
		Cuprizone, 6			Myelin models
	During interictal				F (1, 40) = 0.008866	Multiple comparisons;
						Mbp-/- vs. Cuprizone
					Frequency bands
					F (3, 40) = 12.66	Delta, P = 0.9952
						Theta, P > 0.9999
						Beta, P > 0.9999
						Gamma, P = 0.9346

## Sheet: Fig. 2d
Layers	Control						Cuprizone
1	0	0	0	0	0	0	0	0	0	0	0	0
2 and 3	322	297.4	276.779	412.728	320.367	482.149	370	510.7	217.611	216.042	254.49	191.847
4	486	415.04	328.183	254.775	209.142	340.172	360	611.9	271.712	330.415	287.582	177.985
5	397	395.17	373.339	383.985	415.004	369.851	473	502.6	301.438	403.672	328.925	203.916
6	211.1	186.5	252.231	201.019	137.493	219.953	233	354.5	172.746	100.805	137.063	80.5199
	Figure 2d	Control vs.	Mice, N	Two-way ANOVA	Šidák’s multiple comparisons	Interaction	Pinteraction = 0.7821
		Cuprizone				F (4,40) = 0.43	Ptreatment = 0.6240
			Control, 6			Treatment	Pcortical layers < 10–4
			Cuprizone, 6			F (1,10) = 0.25
						Cortical layers
						F (2.751, 2751)

## Sheet: Fig. 2f
	Control	Cuprizone
	111	106
	128	155
	139	43
	105	76
	63	83
	85	78
	79	69
	73	55
	68	82
		68
		78
	Figure 2f	Control vs.	Cells, N	Mann-Whitney test	Two tailed	U = 35.5	P = 0.3032
		Cuprizone
			Control, 9
			Cuprizone, 11

## Sheet: Fig. 2g
	Control	Cuprizone
	6.81972	6.97312
	6.65224	9.52006
	3.72993	2.18521
	5.32459	4.0693
	2.75416	4.50971
	3.02157	4.3461
	5.26346	3.05706
	3.82029	3.38855
	1.94847	2.6599
		3.2111
		3.56029
	Figure 2g	Control vs.	Cells, N	Mann-Whitney test	Two tailed	U = 47	P = 0.8822
		Cuprizone
			Control, 9
			Cuprizone, 11

## Sheet: Fig. 2j
	Control	Cuprizone
	98.96	380
	247.43	397.5
	247.4	197
	247.43	395.673
	148.45	297.31
	199	247.72			Figure 2j	Control vs.	Cells, N	Mann-Whitney test	Two tailed	U = 278	P = 0.0003
	199.06	199.009				Cuprizone
	199.17	199.052					Control, 42
	149.16	248.631					Cuprizone, 27
	298.31	248.67
	298.23	99.7251
	149.14	347.825
	248.45	298.42
	298.28	199.099
	99.63	199.108
	199.1	198.988
	149.27	297.1
	298.44	297.12
	199.06	197.87
	99.71	347.59
	99.66	496.74
	298.59	297.03
	248.55	398.83
	380.42	395.49
	99.69	298.79
	199.06	493.68
	397.16	298.45
	248.47
	149.21
	149.33
	99.01
	248.58
	133.39
	199.03
	99.14
	243.28
	344.45
	99.62
	245.91
	195.01
	198.98
	247.79

## Sheet: Fig. 2k
	Control	Cuprizone
	-67.16	-73.72
	-74.1	-75.24
	-74.66	-57.8951
	-67.73	-76.6387		Figure 2k	Control vs.	Cells, N	Mann-Whitney test	Two tailed	U = 333	P = 0.0036
	-73.2	-76.0601			Cuprizone
	-50.27	-71.8396				Control, 42
	-71.16	-70.84				Cuprizone, 27
	-69.16	-68.73
	-55.97	-75.51
	-71.96	-69.32
	-70.91	-70.94
	-70.3	-67.1
	-65.44	-67.7675
	-63.85	-68.2718
	-53.02	-70.2787
	-67.29	-65.7876
	-65.99	-71.57
	-72.21	-75.17
	-71.66	-68.48
	-58.17	-67.91
	-61.54	-68.64
	-65.2	-61.8
	-60.39	-62.56
	-57.4682	-72.05
	-67.6	-69.73
	-69.17	-67.04
	-67.27	-59.8333
	-73.17
	-52.58
	-61.94
	-51.48
	-68.51
	-64.47
	-66.41
	-65.62
	-58.03
	-65.7
	-47.45
	-61.11
	-68.3
	-61.99
	-67.08

## Sheet: Figure 2 supplement 2e
Branch order	Control												Cuprizone
1	1	1	1	1	1	1	1	1	1				1	1	1	1	1	1	1	1	1	1	1
2	2	2	2	2	2	2	2	2	2				2	2	2	2	2	3	2	2	2	2	2
3	4	4	4	5	4	4	4	2	2				4	4	4	4	2	4	4	4	4	4	2
4	9	6	6	8	2	8	7	2	4				6	7	8	4	2	8	6	8	4	9	5
5	14	10	12	14	4	12	13	2	4				10	12	10	5	4	10	8	8	4	10	10
6	12	17	13	13	8	12	20	4	9				12	18	12	10	6	15	11	10	7	12	10
7	15	18	23	12	12	10	16	4	12				20	20	14	14	10	13	12	8	4	10	10
8	20	14	24	19	14	14	14	6	14				24	24	7	19	6	8	11	6	6	8	10
9	18	16	25	18	10	8	2	4	10				15	18	4	10	4	6	6	4	6	4	14
10	12	14	15	8	6	2	0	2	6				10	21	0	8	2	4	2	4	8	4	8
11	4	14	6	5	0	4	0	4	4				2	10	0	6	2	4	2	0	10	2	4
12	0	8	4	0	0	4	0	8	0				0	10	0	0	2	2	2	0	8	2	2
13	0	2	4	0	0	4	0	14	0				0	6	0	0	0	0	2	0	12	0	0
14	0	2	0	0	0	0	0	12	0				0	2	0	0	0	0	0	0	2	0	0
15	0	0	0	0	0	0	0	6	0				0	0	0	0	0	0	0	0	4	0	0
Figure supplement 2e	Control vs.	Cells, N	Two-way ANOVA	Šidák’s multiple comparisons	Treatment  axon branch-number	PTreatment  axon branch-number = 0.8028
	Cuprizone				F (14, 252) = 0.6699	Ptreatment = 0.2719
		Control, 9			Treatment	Paxon branch-number < 0.0001
		Cuprizone, 11			F (1, 18) = 1.285
					Axon branch number
					F (2.916, 52.48) = 33.99

[truncated: 30 more sheets: Figure 2 supplement 2f, Fig. 3c, Fig. 3e, Fig. 3f, Fig. 3g, Fig. 3h, Fig. 3k, Figure 3 supplement 1b, Figure 3 supplement 1c, Figure 3 supplement 1e, Figure 3 supplement 1f, Figure 3 supplement 1h, Figure 3 supplement 1i, Figure 3 supplement 2b, Figure 3 supplement 3b, Figure 3 supplement 3d, Figure 3 supplement 3f, Figure 3 supplement 3g, Figure 3 supplement 4b, Figure 3 supplement 4c …]
